# Supplementary material
Source: Springer Nature journal article supplement (https://www.springermedizin.de/resource/supplementary/12885_2010_2793_MOESM7_ESM.pdf/9461958)

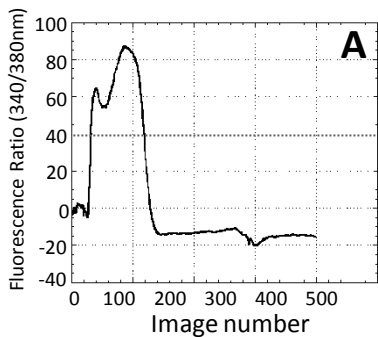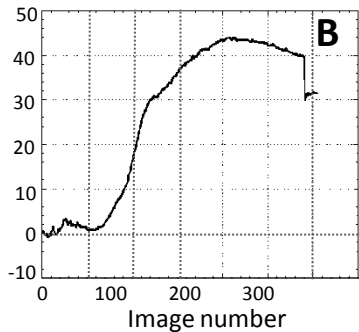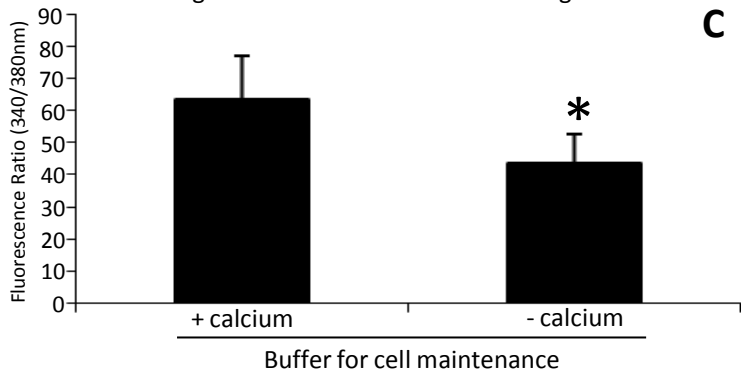

Supplement: MOESM7 [file 9461958]
